# Supplementary material for: Coupling metabolic addiction with negative autoregulation to improve strain stability and pathway yield
Source: PubMed Central journal article supplement (PMC7510839; doi:10.1016/j.ymben.2020.05.005), 2020-09
Supplement: mmc1.pdf [file mmc1.pdf]

## Supplementary Materials

### **Coupling metabolic addiction with negative autoregulation to improve strain stability and pathway yield**

Yongkun Lv<sup>1,2,3</sup>, Yang Gu<sup>1,3</sup>, Jingliang Xu<sup>2</sup>, Jingwen Zhou<sup>3</sup> and Peng Xu<sup>1\*</sup>

<sup>1</sup> Department of Chemical, Biochemical and Environmental Engineering, University of Maryland Baltimore County, Baltimore, MD 21250, USA.

<sup>2</sup> School of Chemical Engineering, Zhengzhou University, Zhengzhou, Henan 450001, China.

<sup>3</sup> National Engineering Laboratory for Cereal Fermentation Technology, Jiangnan University, Wuxi, Jiangsu 214122, China.

---

\*Corresponding author Tel: +1(410)-455-2474; fax: +1(410)-455-1049. E-mail address: zhoujw1982@jiangnan.edu.cn (JWZ), and pengxu@umbc.edu (PX).

## Supplementary figures

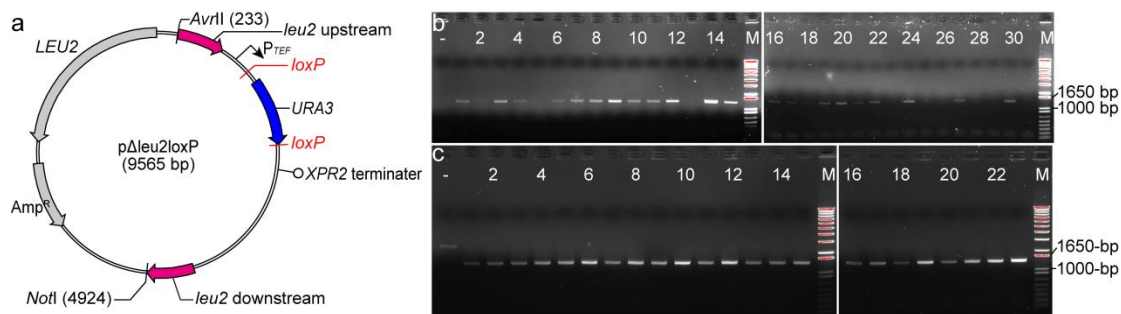

**Supplementary Fig. 1** Site-directed integration at *leu2* loci and *URA3* marker curation.

**a** Structure of plasmid pΔleu2loxP. *leu2* upstream and *leu2* downstream refer to the up and down homologous sequence of *leu2* loci. The *loxP* sites were used for *URA3* marker curation. **b** Colony PCR analysis of site-directed integration at *leu2* site. The colony PCR was carried out using primer pair *leu2\_Inte F/leu2\_Inte R*. The positive colony will yield a 1368-bp band, while the negative colony will not yield any specific band. **c** Colony PCR analysis of *URA3* marker curation. The colony PCR was carried out using primer pair *26srDNA2s F/XPR2\_Seq*. The positive colony will yield a 1533-bp band, while the negative colony will yield a 2432-bp band.

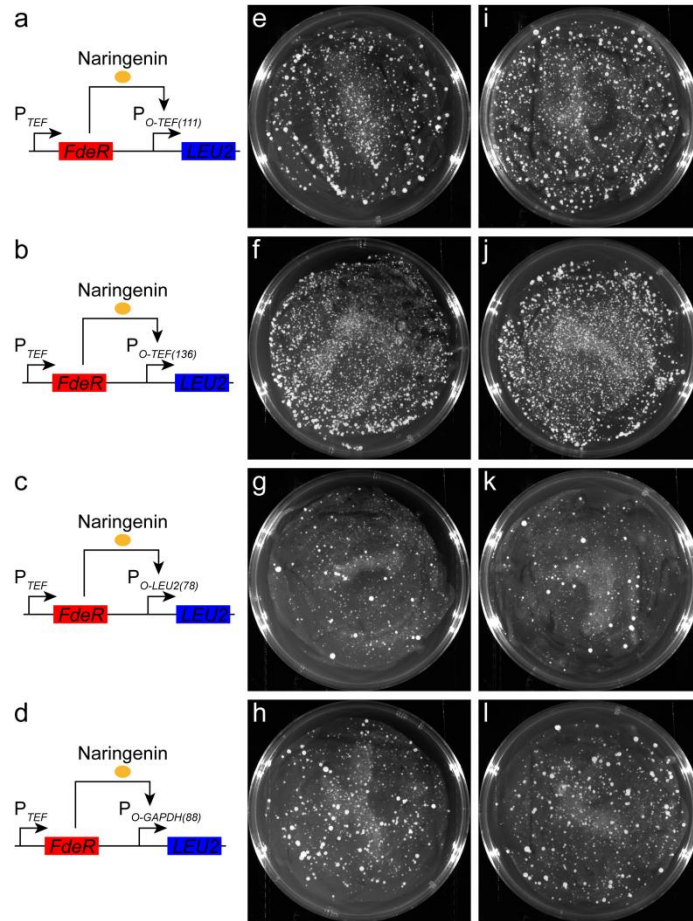

**Supplementary Fig. 2** Analysis of naringenin addiction circuits on CSM-Leu and CSM-Leu+Naringenin plates. **a-d** Components of naringenin addiction circuits containing promoters  $P_{O-TEF(111)}$ ,  $P_{O-TEF(136)}$ ,  $P_{O-LEU2(78)}$ , and  $P_{O-GAPDH(88)}$ . **e-h** The control set. Growth of *Y. lipolytica* transformants containing promoters  $P_{O-TEF(111)}$ ,  $P_{O-TEF(136)}$ ,  $P_{O-LEU2(78)}$ , and  $P_{O-GAPDH(88)}$  on CSM-Leu plates. Pictures were taken 3 days after transformation. **i-l** Growth of *Y. lipolytica* transformants containing promoters  $P_{O-TEF(111)}$ ,  $P_{O-TEF(136)}$ ,  $P_{O-LEU2(78)}$ , and  $P_{O-GAPDH(88)}$  on CSM-Leu+Naringenin plates. Pictures were taken 3 days after transformation.

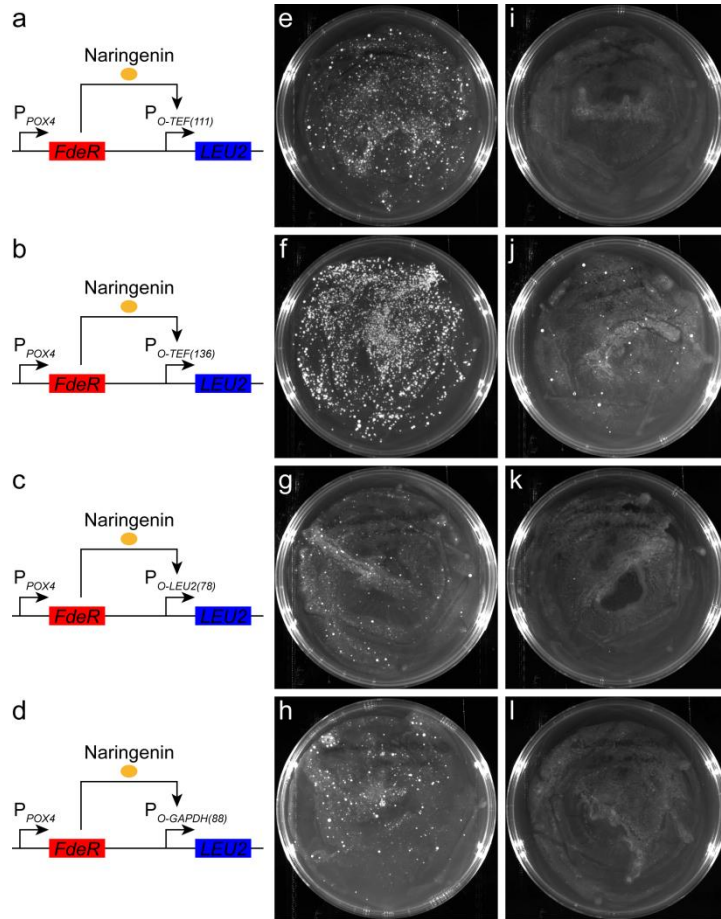

**Supplementary Fig. 3** Analysis of complete and incomplete naringenin addiction circuits in naringenin producing strain NarPro/ASC\_Rep. **a-d** Components of naringenin addiction circuits containing promoters  $P_{O-TEF(111)}$ ,  $P_{O-TEF(136)}$ ,  $P_{O-LEU2(78)}$ , and  $P_{O-GAPDH(88)}$ . FdeR was expressed using weaker promoter  $P_{POX4}$ . **e-h** Growth of NarPro/ASC\_Rep containing complete addiction circuits on leucine drop-out CSM-leu plates. *LEU2* expression was controlled by  $P_{O-TEF(111)}$ ,  $P_{O-TEF(136)}$ ,  $P_{O-LEU2(78)}$ , and  $P_{O-GAPDH(88)}$ , respectively. Pictures were taken 3 days after transformation. **i-l** Negative control set. Growth of NarPro/ASC\_Rep containing incomplete addiction circuits without FdeR on leucine drop-out CSM-leu plates. *LEU2* expression was controlled by  $P_{O-TEF(111)}$ ,  $P_{O-TEF(136)}$ ,  $P_{O-LEU2(78)}$ , and  $P_{O-GAPDH(88)}$ , respectively. Pictures were taken 3 days

after transformation.

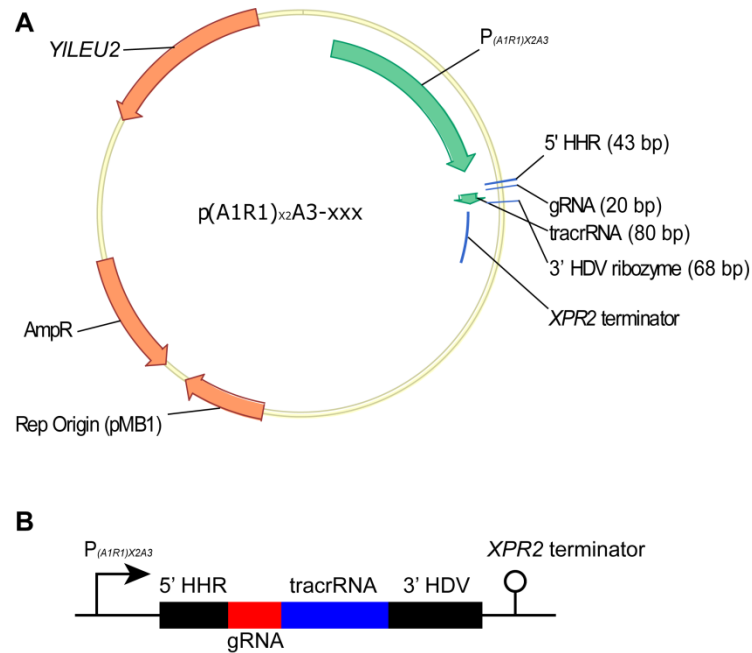

**Supplementary Fig. 4. Genetic structure of plasmid  $p(A1R1)_{x2}A3-xxx$ .** “xxx” here refers to gRNA. For instance,  $p(A1R1)_{x2}A3-FAS1-2$  refers to  $p(A1R1)_{x2}A3$  containing gRNA FAS1-2 generating components. **A.** Overall structure of plasmid  $p(A1R1)_{x2}A3-xxx$ . **B.** Structure of the gRNA generating components. The 5' HHR and 3' HDV ribozyme sites were used for generating mature gRNAs.

## Supplementary tables

**Supplementary Table 1 gRNA sequences and targeting locations**

| gRNA   | Sequence (5'-3')     | Targeting locations |
|--------|----------------------|---------------------|
| FAS1-1 | ACTCACCAAATCAAATAATG | UTR                 |
| FAS1-2 | TTTTGCTACAGGAAACAGCG | Intron              |
| FAS1-3 | GGTGCAGTTGATGTACAGAG | CDS                 |
| FAS2-1 | AAACCTGAGCCACAAATCAG | Intron              |
| FAS2-2 | GGGCATCACCACCAGCAGCG | CDS                 |
| FAS2-3 | GAAGGGGACAACAATCAGAG | CDS                 |
| FabD-1 | GCAGCATTCTTCCCCGACA  | CDS                 |
| FabD-2 | GAGGCGTTGGATACCACCTG | CDS                 |
| FabD-3 | CACATGATATACACAAAGCA | Intron              |

## Supplementary Table 2 Plasmids used in this paper

| Plasmid                                 | Annotation                                                                           |
|-----------------------------------------|--------------------------------------------------------------------------------------|
| pYLXP'                                  | A frozen stock of our Lab <sup>1</sup> .                                             |
| pYLXP'-Nluc                             | A frozen stock of our Lab <sup>2</sup> .                                             |
| pYLXP'-dCas9                            | A frozen stock of our Lab.                                                           |
| pYLXP'-Cre                              | A frozen stock of our Lab <sup>3</sup> .                                             |
| pYLXP'-URA3-loxP                        | A frozen stock of our Lab <sup>3</sup> .                                             |
| pΔleu2loxP                              | Integration at <i>leu2</i> site.                                                     |
| pΔxpr2loxP                              | Integration at <i>xpr2</i> site.                                                     |
| pΔleu2loxP-POX2(1591)-Nluc              | Integrating POX2(1591)-Nluc at <i>leu2</i> site.                                     |
| pΔleu2loxP-A1R1A3-Nluc                  | Integrating A1R1A3-Nluc at <i>leu2</i> site.                                         |
| pΔleu2loxP-(A1R1) <sub>x2</sub> A3-Nluc | Integrating (A1R1) <sub>x2</sub> A3-Nluc at <i>leu2</i> site.                        |
| pΔleu2loxP-FAS1-1-dCas9                 | Integrating gRNA FAS1-1 and dCas9 circuits at <i>leu2</i> site.                      |
| pΔleu2loxP-FAS1-2-dCas9                 | Integrating gRNA FAS1-2 and dCas9 circuits at <i>leu2</i> site.                      |
| pΔleu2loxP-FAS1-3-dCas9                 | Integrating gRNA FAS1-3 and dCas9 circuits at <i>leu2</i> site.                      |
| pΔleu2loxP-FAS2-1-dCas9                 | Integrating gRNA FAS2-1 and dCas9 circuits at <i>leu2</i> site.                      |
| pΔleu2loxP-FAS2-2-dCas9                 | Integrating gRNA FAS2-2 and dCas9 circuits at <i>leu2</i> site.                      |
| pΔleu2loxP-FAS2-3-dCas9                 | Integrating gRNA FAS2-3 and dCas9 circuits at <i>leu2</i> site.                      |
| pΔleu2loxP-FabD-1-dCas9                 | Integrating gRNA FabD-1 and dCas9 circuits at <i>leu2</i> site.                      |
| pΔleu2loxP-FabD-2-dCas9                 | Integrating gRNA FabD-2 and dCas9 circuits at <i>leu2</i> site.                      |
| pΔleu2loxP-FabD-3-dCas9                 | Integrating gRNA FabD-3 and dCas9 circuits at <i>leu2</i> site.                      |
| pΔleu2loxP-FAS1-2-FAS2-1-dCas9          | Integrating gRNAs FAS1-2 and FAS2-1 and dCas9 circuits at <i>leu2</i> site.          |
| pΔleu2loxP-FAS1-2-FabD-1-dCas9          | Integrating gRNAs FAS1-2 and FabD-1 and dCas9 circuits at <i>leu2</i> site.          |
| pΔleu2loxP-FAS2-1-FabD-1-dCas9          | Integrating gRNAs FAS2-1 and FabD-1 and dCas9 circuits at <i>leu2</i> site.          |
| pΔleu2loxP-FAS1-2-FAS2-1-FabD-1-dCas9   | Integrating gRNAs FAS1-2, FAS2-1, and FabD-1 and dCas9 circuits at <i>leu2</i> site. |
| pOTEF(111)                              | Replacing <i>TEF</i> promoter in pYLXP'2 with <i>OTEF(111)</i> hybrid promoter.      |
| pOTEF(136)                              | Replacing <i>TEF</i> promoter in pYLXP'2 with <i>OTEF(136)</i> hybrid promoter.      |
| pOLEU2(78)                              | Replacing <i>TEF</i> promoter in pYLXP'2 with <i>OLEU2(78)</i> hybrid promoter.      |
| pOGAPDH(88)                             | Replacing <i>TEF</i> promoter in pYLXP'2 with <i>OGAPDH(88)</i> hybrid promoter.     |
| pOTEF(111)-Nluc                         | Placing <i>Nluc</i> under the control of hybrid promoter <i>OTEF(111)</i> .          |
| pOTEF(136)-Nluc                         | Placing <i>Nluc</i> under the control of hybrid promoter <i>OTEF(136)</i> .          |

|                            |                                                                                    |
|----------------------------|------------------------------------------------------------------------------------|
| pOLEU2(78)-Nluc            | Placing <i>Nluc</i> under the control of hybrid promoter <i>OLEU2(78)</i> .        |
| pOGAPDH(88)-Nluc           | Placing <i>Nluc</i> under the control of hybrid promoter <i>OGAPDH(88)</i> .       |
| pOTEF(111)-LEU2            | Placing <i>LEU2</i> under the control of hybrid promoter <i>OTEF(111)</i> .        |
| pOTEF(136)-LEU2            | Placing <i>LEU2</i> under the control of hybrid promoter <i>OTEF(136)</i> .        |
| pOLEU2(78)-LEU2            | Placing <i>LEU2</i> under the control of hybrid promoter <i>OLEU2(78)</i> .        |
| pOGAPDH(88)-LEU2           | Placing <i>LEU2</i> under the control of hybrid promoter <i>OGAPDH(88)</i> .       |
| pYLP'-FdeR                 | Placing <i>FdeR</i> under the control of promoter <i>TEF</i> .                     |
| pYaliJ1-FdeR               | Placing <i>FdeR</i> under the control of promoter <i>POX4</i> .                    |
| pYaliL1-FdeR               | Placing <i>FdeR</i> under the control of promoter <i>IDP2</i> .                    |
| pOTEF(111)-FdeR            | Placing <i>FdeR</i> under the control of hybrid promoter <i>OTEF(111)</i> .        |
| pOTEF(136)-FdeR            | Placing <i>FdeR</i> under the control of hybrid promoter <i>OTEF(136)</i> .        |
| pOLEU2(78)-FdeR            | Placing <i>FdeR</i> under the control of hybrid promoter <i>OLEU2(78)</i> .        |
| pOGAPDH(88)-FdeR           | Placing <i>FdeR</i> under the control of hybrid promoter <i>OGAPDH(88)</i> .       |
| pOTEF(111)-Nluc-FdeR       | pOTEF(111)-Nluc containing <i>FdeR</i> under the control of <i>TEF</i> promoter.   |
| pOTEF(136)-Nluc-FdeR       | pOTEF(136)-Nluc containing <i>FdeR</i> under the control of <i>TEF</i> promoter.   |
| pOLEU2(78)-Nluc-FdeR       | pOLEU2(78)-Nluc containing <i>FdeR</i> under the control of <i>TEF</i> promoter.   |
| pOGAPDH(88)-Nluc-FdeR      | pOGAPDH(88)-Nluc containing <i>FdeR</i> under the control of <i>TEF</i> promoter.  |
| pOTEF(111)-LEU2-FdeR       | pOTEF(111)-LEU2 containing <i>FdeR</i> under the control of <i>TEF</i> promoter.   |
| pOTEF(136)-LEU2-FdeR       | pOTEF(136)-LEU2 containing <i>FdeR</i> under the control of <i>TEF</i> promoter.   |
| pOLEU2(78)-LEU2-FdeR       | pOLEU2(78)-LEU2 containing <i>FdeR</i> under the control of <i>TEF</i> promoter.   |
| pOGAPDH(88)-LEU2-FdeR      | pOGAPDH(88)-LEU2 containing <i>FdeR</i> under the control of <i>TEF</i> promoter.  |
| pOTEF(111)-LEU2-POX4-FdeR  | pOTEF(111)-LEU2 containing <i>FdeR</i> under the control of <i>POX4</i> promoter.  |
| pOTEF(136)-LEU2-POX4-FdeR  | pOTEF(136)-LEU2 containing <i>FdeR</i> under the control of <i>POX4</i> promoter.  |
| pOLEU2(78)-LEU2-POX4-FdeR  | pOLEU2(78)-LEU2 containing <i>FdeR</i> under the control of <i>POX4</i> promoter.  |
| pOGAPDH(88)-LEU2-POX4-FdeR | pOGAPDH(88)-LEU2 containing <i>FdeR</i> under the control of <i>POX4</i> promoter. |
| pOTEF(111)-LEU2-IDP2-FdeR  | pOTEF(111)-LEU2 containing <i>FdeR</i> under the control of <i>IDP2</i> promoter.  |
| pOTEF(136)-LEU2-IDP2-FdeR  | pOTEF(136)-LEU2 containing <i>FdeR</i> under the control of <i>IDP2</i>            |



|                                     |                                                                                                    |
|-------------------------------------|----------------------------------------------------------------------------------------------------|
|                                     | promoter.                                                                                          |
| pOLEU2(78)-LEU2-IDP2-FdeR           | pOLEU2(78)-LEU2 containing <i>FdeR</i> under the control of <i>IDP2</i> promoter.                  |
| pOGAPDH(88)-LEU2-IDP2-FdeR          | pOGAPDH(88)-LEU2 containing <i>FdeR</i> under the control of <i>IDP2</i> promoter.                 |
| pOTEF(136)-LEU2-OTEF(111)-FdeR      | pOTEF(136)-LEU2 containing <i>FdeR</i> under the control of <i>OTEF(111)</i> promoter.             |
| pOTEF(136)-LEU2-OTEF(136)-FdeR      | pOTEF(136)-LEU2 containing <i>FdeR</i> under the control of <i>OTEF(136)</i> promoter.             |
| pOTEF(136)-LEU2-OLEU2(78)-FdeR      | pOTEF(136)-LEU2 containing <i>FdeR</i> under the control of <i>OLEU2(78)</i> promoter.             |
| pOTEF(136)-LEU2-OGAPDH(88)-FdeR     | pOTEF(136)-LEU2 containing <i>FdeR</i> under the control of <i>OGAPDH(88)</i> promoter.            |
| pΔxpr2loxP-OTEF(111)-Nluc-FdeR      | Integrating OTEF(111)-Nluc-FdeR at <i>xpr2</i> site. Used for testing <i>OTEF(111)</i> promoter.   |
| pΔxpr2loxP-OTEF(136)-Nluc-FdeR      | Integrating OTEF(136)-Nluc-FdeR at <i>xpr2</i> site. Used for testing <i>OTEF(136)</i> promoter.   |
| pΔxpr2loxP-OLEU2(78)-Nluc-FdeR      | Integrating OLEU2(78)-Nluc-FdeR at <i>xpr2</i> site. Used for testing <i>OLEU2(78)</i> promoter.   |
| pΔxpr2loxP-OGAPDH(88)-Nluc-FdeR     | Integrating OGAPDH(88)-Nluc-FdeR at <i>xpr2</i> site. Used for testing <i>OGAPDH(88)</i> promoter. |
| pΔxpr2loxP-OTEF(111)-LEU2           | Integrating OTEF(111)-LEU2 at <i>xpr2</i> site. Used as control.                                   |
| pΔxpr2loxP-OTEF(136)-LEU2           | Integrating OTEF(136)-LEU2 at <i>xpr2</i> site. Used as control.                                   |
| pΔxpr2loxP-OLEU2(78)-LEU2           | Integrating OLEU2(78)-LEU2 at <i>xpr2</i> site. Used as control.                                   |
| pΔxpr2loxP-OGAPDH(88)-LEU2          | Integrating OGAPDH(88)-LEU2 at <i>xpr2</i> site. Used as control.                                  |
| pΔxpr2loxP-OTEF(111)-LEU2-FdeR      | Integrating OTEF(111)-LEU2-FdeR at <i>xpr2</i> site.                                               |
| pΔxpr2loxP-OTEF(136)-LEU2-FdeR      | Integrating OTEF(136)-LEU2-FdeR at <i>xpr2</i> site.                                               |
| pΔxpr2loxP-OLEU2(78)-LEU2-FdeR      | Integrating OLEU2(78)-LEU2-FdeR at <i>xpr2</i> site.                                               |
| pΔxpr2loxP-OGAPDH(88)-LEU2-FdeR     | Integrating OGAPDH(88)-LEU2-FdeR at <i>xpr2</i> site.                                              |
| pΔxpr2loxP-OTEF(111)-LEU2-POX4-FdeR | Integrating OTEF(111)-LEU2-POX4-FdeR at <i>xpr2</i> site.                                          |
| pΔxpr2loxP-OTEF(136)-LEU2-POX4-FdeR | Integrating OTEF(136)-LEU2-POX4-FdeR at <i>xpr2</i> site.                                          |

|                                           |                                                                 |
|-------------------------------------------|-----------------------------------------------------------------|
| pΔxpr2loxP-OLEU2(78)-LEU2-POX4-FdeR       | Integrating OLEU2(78)-LEU2-POX4-FdeR at <i>xpr2</i> site.       |
| pΔxpr2loxP-OGAPDH(88)-LEU2-POX4-FdeR      | Integrating OGAPDH(88)-LEU2-POX4-FdeR at <i>xpr2</i> site.      |
| pΔxpr2loxP-OTEF(111)-LEU2-IDP2-FdeR       | Integrating OTEF(111)-LEU2-IDP2-FdeR at <i>xpr2</i> site.       |
| pΔxpr2loxP-OTEF(136)-LEU2-IDP2-FdeR       | Integrating OTEF(136)-LEU2-IDP2-FdeR at <i>xpr2</i> site.       |
| pΔxpr2loxP-OLEU2(78)-LEU2-IDP2-FdeR       | Integrating OLEU2(78)-LEU2-IDP2-FdeR at <i>xpr2</i> site.       |
| pΔxpr2loxP-OGAPDH(88)-LEU2-IDP2-FdeR      | Integrating OGAPDH(88)-LEU2-IDP2-FdeR at <i>xpr2</i> site.      |
| pΔxpr2loxP-OTEF(136)-LEU2-OTEF(111)-FdeR  | Integrating OTEF(136)-LEU2-OTEF(111)-FdeR at <i>xpr2</i> site.  |
| pΔxpr2loxP-OTEF(136)-LEU2-OTEF(136)-FdeR  | Integrating OTEF(136)-LEU2-OTEF(136)-FdeR at <i>xpr2</i> site.  |
| pΔxpr2loxP-OTEF(136)-LEU2-OLEU2(78)-FdeR  | Integrating OTEF(136)-LEU2-OLEU2(78)-FdeR at <i>xpr2</i> site.  |
| pΔxpr2loxP-OTEF(136)-LEU2-OGAPDH(88)-FdeR | Integrating OTEF(136)-LEU2-OGAPDH(88)-FdeR at <i>xpr2</i> site. |

---

### Supplementary Table 3 Primers used in this paper

| Primer        | Sequence (5'-3')                                              |
|---------------|---------------------------------------------------------------|
| leu2-up F     | ATCCCTAAATTTGATGAAAGCCTAGGGCATAAAATGTGGAGAAGAAATC             |
| leu2-up R     | CCAACCCGGTCTCTGTCGTCTGTGGATGTGTGTGGTTGTATG                    |
| leu2-down F   | AGCTTTACCGCAGCAGATCCGTCGTTTCTACGACGCATTGATGG                  |
| leu2-down R   | CACTATTGGCCTATGCGGCCGCTGGCACTGAGCTCGTCTAACGG                  |
| xpr2-up F     | ATCCCTAAATTTGATGAAAGCCTAGGGACGAGGACTCGTCCAACGG                |
| xpr2-up R     | CCAACCCGGTCTCTGTCGTACCCGAGAAGATCAGCGTTCTGTG                   |
| xpr2-down F   | AGCTTTACCGCAGCAGATCCGACGCCAACACCAAGCTGGT                      |
| xpr2-down R   | CACTATTGGCCTATGCGGCCGCGGACTCAGTAATAAGAGCCTCG                  |
| Nluc F        | ACCAGCACTTTTTGCAGTACTAACCGCAGGTCTTCACACTCGAAGATTTCCG          |
| Nluc R        | CATAGCACGCGTGTAGATACTTACGCCAGAATGCGTTCGCAC                    |
| LEU2 F        | ACCAGCACTTTTTGCAGTACTAACCGCAGGAACCCGAAACTAAGAAGACCAAGA        |
| LEU2 R        | CATAGCACGCGTGTAGATACTTATACACTAGCGGACCCTGCCGGT                 |
| pPOX2(1591) F | CTAAATTTGATGAAAGCCTAGGGACGACGATATTCCGGTCCCGAAACCC             |
| pPOX2(1591) R | CTGCCTCTGAAACTCACCATTCTAGAGGCGTCGTTGCTTGTGTG                  |
| A3 F          | CGAATGGTACGATTCCGCCACAATTGGACATGTTTGTTCGATC                   |
| A1R1 R        | GATCGGAAAAACAAACATGTCCAATTGTGGCGGAATCGTACCATTCCG              |
| A1R1_R1       | GGTTTCGGGACCGGAATATCTGGCGGAATCGTACCATTCCG                     |
| A1R1_F2       | GATATTCCGGTCCCGAAACCC                                         |
| A1R1_R2       | TGGCGGAATCGTACCATTCCG                                         |
| gRNA F        | TCCCTAAATTTGATGAAAGCCTAGGGACGACGATATTCCGGTCC                  |
| gRNA R        | CCTTTTATCAGACATAGTCGACTCCTCCGTTATTGTCTCGCTAGC                 |
| gRNA_FAS1-1 F | GACGAAACGAGTAAGCTCGTCACTACCAAATCAAATAATGGTTTTAGAGCTAGAAATAG   |
| gRNA_FAS1-1 R | ACGAGCTTACTCGTTTCGTCTCACGGACTCATCAGACTCACCTGCGGTTAGTACTGCAA   |
| gRNA_FAS1-2 F | GACGAAACGAGTAAGCTCGTCTTTTGCTACAGGAAACAGCGGTTTTAGAGCTAGAAATAG  |
| gRNA_FAS1-2 R | ACGAGCTTACTCGTTTCGTCTCACGGACTCATCAGTTTTGCCTGCGGTTAGTACTGCAA   |
| gRNA_FAS1-3 F | GACGAAACGAGTAAGCTCGTCCGGTGCAGTTGATGTACAGAGTTTTAGAGCTAGAAATAG  |
| gRNA_FAS1-3 R | ACGAGCTTACTCGTTTCGTCTCACGGACTCATCAGGGTGCAGTTCGCGGTTAGTACTGCAA |
| gRNA_FAS2-1 F | GACGAAACGAGTAAGCTCGTCAAACCTGAGCCACAAATCAGGTTTTAGAGCTAGAAATAG  |
| gRNA_FAS2-1 R | ACGAGCTTACTCGTTTCGTCTCACGGACTCATCAGAAACCTCTGCGGTTAGTACTGCAA   |
| gRNA_FAS2-2 F | GACGAAACGAGTAAGCTCGTCCGGCATCACCACCAGCAGCGGTTTTAGAGCTAGAAATAG  |
| gRNA_FAS2-2 R | ACGAGCTTACTCGTTTCGTCTCACGGACTCATCAGGGGCATCTGCGGTTAGTACTGCAA   |

|                                   |                                                              |
|-----------------------------------|--------------------------------------------------------------|
| gRNA_FAS2-3 F                     | GACGAAACGAGTAAGCTCGTCGAAGGGGACAACAATCAGAGGTTTTAGAGCTAGAAATAG |
| gRNA_FAS2-3 R                     | ACGAGCTTACTCGTTTCGTCTCACGGACTCATCAGGAAGGGCTGCGGTTAGTACTGCAA  |
| gRNA_FabD-1 F                     | GACGAAACGAGTAAGCTCGTCGCAGCATTCTCCCCGGACAGTTTTAGAGCTAGAAATAG  |
| gRNA_FabD-1 R                     | ACGAGCTTACTCGTTTCGTCTCACGGACTCATCAGGCAGCACTGCGGTTAGTACTGCAA  |
| gRNA_FabD-2 F                     | GACGAAACGAGTAAGCTCGTCGAGGCGTTGGATAACACCTGGTTTTAGAGCTAGAAATAG |
| gRNA_FabD-2 R                     | ACGAGCTTACTCGTTTCGTCTCACGGACTCATCAGGAGGCGCTGCGGTTAGTACTGCAA  |
| gRNA_FabD-3 F                     | GACGAAACGAGTAAGCTCGTCCACATGATATACACAAAGCAGTTTTAGAGCTAGAAATAG |
| gRNA_FabD-3 R                     | ACGAGCTTACTCGTTTCGTCTCACGGACTCATCAGCACATGCTGCGGTTAGTACTGCAA  |
| TEF_F2                            | GGGTATAAAAGACCACCGTCCCC                                      |
| 26srDNA2s F                       | ATCCCTAAATTTGATGAAAGCCTAGGCAGACACTGCGTCGCTCCGTCC             |
| XPR2_Seq                          | GGTGTTGGACTCAGTAATAAGAGCC                                    |
| leu2_Inte F                       | GTGTGCACTCCAACTTTTACAC                                       |
| xpr2_Inte F                       | AGCCGTGTTTCGTGACGCAATC                                       |
| leu2_Inte R                       | GATCATGCACACATAAGGTCC                                        |
| FAS1 <sub>rt</sub> F <sup>1</sup> | GTCTCTGTATGGTCTGTGTCTTG                                      |
| FAS1 <sub>rt</sub> R              | GAGTGAAAGGAGAGGTGATG                                         |
| FAS2 <sub>rt</sub> F              | CACTCTCCCTTTTCTCCACATC                                       |
| FAS2 <sub>rt</sub> R              | AGCAACCTCAAGACCATCG                                          |
| FabD <sub>rt</sub> F              | GCATCTCAAAGCCTCCAAAC                                         |
| FabD <sub>rt</sub> R              | TGAAATCGGGACGGATCTTG                                         |
| ACT1 <sub>rt</sub> F              | GGTATCGTTCTTGACTCTGGTG                                       |
| ACT1 <sub>rt</sub> R              | AGGTAGTCGGTAAGATCTCGG                                        |

---

1. The subscripts “<sub>rt</sub>” refers to primers used for qRT-PCR.

## References

1. Xu, P.; Qiao, K. J.; Ahn, W. S.; Stephanopoulos, G., Engineering *Yarrowia lipolytica* as a platform for synthesis of drop-in transportation fuels and oleochemicals. *Proc. Natl. Acad. Sci. U. S. A.* **2016**, *113* (39), 10848-10853.
2. Wong, L.; Engel, J.; Jin, E.; Holdridge, B.; Xu, P., YaliBricks, a versatile genetic toolkit for streamlined and rapid pathway engineering in *Yarrowia lipolytica*. *Metab. Eng. Commun.* **2017**, *5*, 68-77.
3. Lv, Y.; Edwards, H.; Zhou, J.; Xu, P., Combining 26s rDNA and the Cre-loxP system for iterative gene integration and efficient marker curation in *Yarrowia lipolytica*. *ACS Synth. Biol.* **2019**.
